# Supplementary material for: Global Glomerulosclerosis in Kidney Biopsies With Differing Amounts of Cortex: A Clinical-Pathologic Correlation Study
Source: PubMed Central journal article supplement — Kidney Med. 2019 Jul 12;1(4):153–61. doi: 10.1016/j.xkme.2019.05.004 (PMC7380371; doi:10.1016/j.xkme.2019.05.004), 2019-07-12
Supplement: mmc1.pdf [file mmc1.pdf]

## Item S1

## Supplementary Description of Statistical Methods

## Beta-Binomial Model for %GSG

## Data

After the needle core biopsy sections were scanned and the glomerular profiles and area of cortex were traced, the data for kidney biopsy  $i$  ( $i = 1, \dots, n$ ) consisted of

$$\begin{aligned} a_i &= \text{area of cortex in mm}^2 \\ n_i &= \text{total number of glomeruli} \\ g_i &= \text{number of GSG} \end{aligned}$$

## Model

*Note: Much of our description of the model is based on the documentation of the `betabinomial` function in the `VGAM` package (see reference below).*

Our beta-binomial model assumed that

$$g_i \sim \text{binomial}(n_i, p_i) \quad (1)$$

where  $\sim$  signifies “is distributed as”, and  $\text{binomial}(n, p)$  refers to the binomial distribution with number of trials  $n$  and success probability  $p$ . Here,  $p_i$  is the patient-specific probability that a glomerulus is globally sclerotic, i.e.  $\frac{1}{100}(\text{patient \%GSG})$ . The model further assumed that

$$p_i \sim \text{beta}(\mu_i, \psi_i) \quad (2)$$

where  $\mu_i$  ( $0 < \mu_i < 1$ ) is the mean of the beta distribution, and  $\psi_i$  ( $0 < \psi_i < 1$ ) is a variability parameter. The beta distribution is more commonly described in terms of shape parameters  $\alpha$  and  $\beta$ . The mean-variability parameterization relates to the shape parameterization as follows:

$$\mu = \frac{\alpha}{\alpha + \beta} \quad (3)$$

$$\psi = \frac{1}{1 + \alpha + \beta} \quad (4)$$

The variance of the beta distribution is directly related to the parameter  $\psi$  (hence our term “variability parameter”) but depends on  $\mu$  also:

$$\text{Var}(p_i) = \mu_i(1 - \mu_i)\psi_i \quad (5)$$

The mean and variability of the beta distribution were both allowed to depend on the amount of biopsied cortex, measured by either  $n_i$  or  $a_i$ , in a manner described by logit link equations (below, replace  $n_i$  with  $a_i$  for the model based on cortex area):

$$\log\left(\frac{\mu_i}{1-\mu_i}\right) = \gamma_{\mu 0} + \gamma_{\mu 1}n_i \quad (6)$$

$$\log\left(\frac{\psi_i}{1-\psi_i}\right) = \gamma_{\psi 0} + \gamma_{\psi 1}n_i \quad (7)$$

## Parameter Estimates

The model was fit via maximum likelihood. The parameter estimates of interest were  $\gamma_{\mu 1}$  and  $\gamma_{\psi 1}$ , exponentiated to yield estimates of

$$e^{\gamma_{\mu 1}} = \text{multiplicative change in } \frac{\mu}{1-\mu} \text{ associated with 1 unit increase in } n \text{ (or } a) \quad (8)$$

$$e^{\gamma_{\psi 1}} = \text{multiplicative change in } \frac{\psi}{1-\psi} \text{ associated with 1 unit increase in } n \text{ (or } a) \quad (9)$$

Since both  $\mu$  and  $\psi$  were estimated to be small ( $\mu < 0.06$ ,  $\psi < 0.12$ ) within the range of our data, we used the approximation

$$\frac{x}{1-x} \approx x \text{ for small } x \quad (10)$$

and report  $100 \times (e^{\gamma_{\mu 1}} - 1)$  as the percent change in  $\mu$  associated with each 1 unit increase in  $n$  or  $a$ . Strictly speaking, it is the percent change in  $\frac{\mu}{1-\mu}$ . Likewise for our reported estimates relating to  $\psi$ .

## Implementation in R

We fit the beta-binomial model using the `vglm` function in the R package `VGAM`. The R code below demonstrates how the model was fit with continuous-valued number of glomeruli (in standard deviations) as the predictor.

```
library(VGAM)
head(biopsies)

##   n_gsg n_nsg n_glom_sd cort_area_sd
## 1     1    20 1.9105717     2.019344
## 2     1     8 0.8188165     1.368577
## 3     1    11 1.0917553     1.907890
## 4     0    12 1.0917553     1.687694
## 5     1    11 1.0917553     1.173255
## 6    11    22 3.0023270     2.241369

fit <- vglm(cbind(n_gsg, n_nsg) ~ n_glom_sd,
  # The "zero = NULL" argument specifies that neither
  # parameter should be intercept-only; both mu and psi
  # should depend on the predictor.
  family = betabinomial(zero = NULL),
  data = biopsies,
  # Using biopsies with >1 glomeruli avoids a
  # warning about extremely small working weights
  # in the model-fitting procedure.
  subset = n_gsg + n_nsg > 1)
# In the parameter names, ":1" refers to mu, ":2" to psi.
exp(coef(fit))
```

```
## (Intercept):1 (Intercept):2 n_glom_sd:1 n_glom_sd:2
## 0.04849442 0.06538981 0.84721524 0.81192099
```

```
100 * (exp(coef(fit)) - 1)
```

```
## (Intercept):1 (Intercept):2 n_glom_sd:1 n_glom_sd:2
## -95.15056 -93.46102 -15.27848 -18.80790
```

```
100 * (exp(confint(fit)) - 1)
```

```
##                2.5 %    97.5 %
## (Intercept):1 -95.75838 -94.455631
## (Intercept):2 -95.53338 -90.427147
## n_glom_sd:1   -20.37274  -9.858304
## n_glom_sd:2  -31.13928  -4.268256
```

## References

- Thomas W. Yee (2018). VGAM: Vector Generalized Linear and Additive Models. R package version 1.0-6. URL <https://CRAN.R-project.org/package=VGAM>

## Detection of 10% GSG

For the comparison of biopsies with 1–9 glomeruli to biopsies with 10 or more glomeruli in terms of their utility for detecting clinically significant %GSG, we estimated the distribution of patient %GSG associated with each group of biopsies using beta-binomial models. One intercept-only model was fit to the biopsies with 1–9 glomeruli and another to the biopsies with 10 or more glomeruli, producing estimates of  $\mu$  and  $\psi$  for each group. The probabilities

$$\text{PPV} = \Pr(\text{patient \%GSG} \geq 10\% \mid \text{biopsy \%GSG} \geq 10\%) \quad (11)$$

$$\text{NPV} = \Pr(\text{patient \%GSG} < 10\% \mid \text{biopsy \%GSG} < 10\%) \quad (12)$$

$$\text{Sensitivity} = \Pr(\text{biopsy \%GSG} \geq 10\% \mid \text{patient \%GSG} \geq 10\%) \quad (13)$$

$$\text{Specificity} = \Pr(\text{biopsy \%GSG} < 10\% \mid \text{patient \%GSG} < 10\%) \quad (14)$$

were calculated using simulation. Simulated numbers of biopsy glomeruli ( $n$ ) were sampled with replacement from the numbers in our data, then true patient proportion GSG values ( $p$ ) were sampled from beta distributions with  $\mu$  and  $\psi$  set equal to the values estimated above for 1–9 glomeruli and for 10 or more glomeruli. GSG counts ( $g$ ) were sampled from binomial( $n, p$ ) distributions using the values of  $n$  and  $p$  from the previous steps. The probabilities were estimated from  $10^6$  simulated kidney/biopsy samples for each biopsy size group. PPV, for example, was calculated as the proportion of cases with  $p \geq 0.1$  among all those with  $g/n \geq 0.1$ .
